# Supplementary material
Source: PubMed Central journal article supplement (PMC7480934)
Supplement: NIHMS1622970-supplement-1.pdf [file NIHMS1622970-supplement-1.pdf]

## Steroid- and disease-related damage in cSLE

**Supplement 1:** Items assessed in the Brief Index of Lupus Damage score by organ system.

| Organ system Items          |                                                                                                                                      |
|-----------------------------|--------------------------------------------------------------------------------------------------------------------------------------|
| Ocular                      | Cataract or retinal damage                                                                                                           |
| Neuropsychiatric            | Cognitive impairment/major psychosis, seizures requiring at least 6 months of therapy, cerebrovascular accident, transverse myelitis |
| Renal                       | End-stage renal disease                                                                                                              |
| Pulmonary                   | Hypertension, fibrosis                                                                                                               |
| Cardiovascular              | Angina/coronary artery bypass, myocardial infarction, pericarditis or pericardiectomy                                                |
| Peripheral vascular disease | Minor tissue loss, significant tissue loss, venous thrombosis                                                                        |
| Gastrointestinal            | Chronic peritonitis, stricture or upper gastrointestinal tract surgery                                                               |
| Muskuloskeletal             | Osteoporosis with fracture or vertebral collapse, avascular necrosis, osteomyelitis                                                  |
| Skin                        | Skin ulceration                                                                                                                      |
| Reproductive                | Premature gonadal failure                                                                                                            |
| Endocrine                   | Diabetes mellitus                                                                                                                    |
| N/A                         | Malignancy                                                                                                                           |

**Legend for supplement 1:** There are 28 total items in the BILD score, and each item equals 1 point. This table is adopted from Yazdany et al, Arthritis Care Res 2011.
